# Supplementary material for: CO oxidation over a ligand coordinated single site Rh catalyst: identification of the active complex
Source: Royal Society of Chemistry journal article supplement (doi:10.1039/d4cy00507d), 2024-01-01
Supplement: d4cy00507d1.pdf [file d4cy00507d1.pdf]

## Supplementary Information

### CO Oxidation over Ligand Coordinated Single Site Rh Catalyst: Identification of Active Complex

Fereshteh Rezvani,<sup>1†</sup> Xuemei Zhou,<sup>1,2†</sup> Debora Motta Meira,<sup>3</sup> George E. Sterbinsky,<sup>4</sup> Steven L.  
Tait\*<sup>1</sup>

<sup>1</sup> Department of Chemistry, Indiana University, 800 E. Kirkwood Ave., Bloomington, Indiana  
47405 (U. S. A.), E-mail: [tait@indiana.edu](mailto:tait@indiana.edu)

<sup>2</sup> School of Chemical Engineering, Sichuan University, No. 24 South Section 1, Yihuan Road,  
Chengdu, 610065 (P.R.C.).

<sup>3</sup> Canadian Light Source, Saskatoon, Saskatchewan, Canada.

<sup>4</sup> Advanced Photon Source, Argonne National Laboratory, 9700 South Cass Avenue, Lemont,  
Illinois 60439 (U.S.A.).

† These authors contributed equally to this publication.

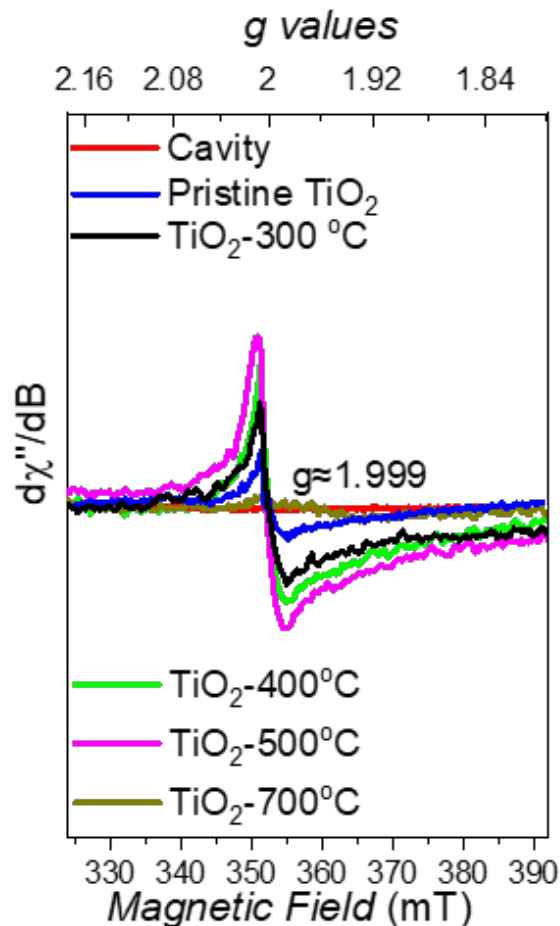

**Fig. S1.** Solid-state EPR spectra for pristine  $TiO_2$  (blue), and for various degrees of defective  $TiO_2$  prepared by annealing at 300 °C, 400 °C, 500 °C, and 700 °C for 1 h in  $H_2/N_2$ . Blank cavity reference shown in red. Figure is reproduced from Zhou, *et al.*,<sup>1</sup> with permission from the Royal Society of Chemistry.

EPR spectra were obtained at room temperature using a Bruker EMX X-band EPR spectrometer. The settings included a microwave frequency of 9.866 GHz, a microwave attenuator set to 15.0 dB, a microwave power of 6.38 mW, a modulation frequency of 100 kHz, and a modulation amplitude of 4.0 G.

We prepared a series of  $TiO_2$  support powders by annealing them at temperatures ranging from 300 °C to 500 °C, to create various surface defect densities. The formation of  $Ti^{3+}/O_v$  states in  $TiO_2$  induced by the annealing process was characterized using continuous wave (CW) electron paramagnetic resonance (EPR) spectroscopy. This technique is widely used to analyze

paramagnetic centers, providing signals based on the g tensor, which can distinguish single electrons trapped in regular lattice sites, interstitial sites, or defective sites. Pristine anatase TiO<sub>2</sub> shows a weak signal at a g-tensor value of approximately 2.00 (**Fig. S1**) due to the naturally occurring Ti<sup>3+</sup>/O<sub>v</sub> in commercial anatase TiO<sub>2</sub>. For anatase powders annealed between 300 °C and 500 °C, there is a noticeable increase in the intensity of this signal (g ≈ 2.00), reaching a three-fold increase for anatase annealed at 500 °C. This indicates a higher concentration of Ti<sup>3+</sup>/O<sub>v</sub> sites introduced by annealing in an H<sub>2</sub>/N<sub>2</sub> atmosphere.

Several studies have examined the effect of oxygen vacancies on the catalytic activity and reaction mechanism of CO oxidation. It is important to note that most of these studies involve catalysts that are nanoparticles rather than single atom catalysts. For instance, Chen, *et al.*, synthesized CuO nanoparticles supported on TiO<sub>2</sub> with a high concentration of oxygen vacancies created through various reduction treatments. This catalyst demonstrated superior catalytic activity compared to CuO supported on pristine TiO<sub>2</sub>. DRIFTS experiments showed that the Cu sites are the adsorption sites for CO, and oxygen vacancies can activate O<sub>2</sub> molecules into reactive oxygen species. Regarding the reaction mechanism, they found that the catalyst follows the Mars-van Krevelen (MvK) mechanism.<sup>2</sup> In another study, it was reported that monoatomic oxygen ions (O<sup>-</sup>) in oxygen vacancy-rich perovskite La<sub>0.8</sub>Sr<sub>0.2</sub>CoO<sub>3</sub> catalysts are the primary active oxygen species during the CO oxidation reaction. The researchers demonstrated that molecular oxygen (O<sub>2</sub>) is more favorably adsorbed and activated on surface oxygen vacancies through a one-electron transfer process, leading to the formation of O<sup>-</sup> species. This significantly enhances low-temperature CO oxidation.<sup>3</sup> In a DFT study by Qi, *et al.*, their calculations showed that the presence of oxygen vacancies on the Pd/CeO<sub>2</sub> surface decreases the energy barrier for the CO oxidation reaction. The dissociation of O<sub>2</sub> is facilitated by the oxygen vacancies around the Pd site.<sup>4</sup>

**Table S1.** Molar ratios of PDO/Rh, Rh/Ti, Cl/Rh, and PDO/Ti from XPS measurements on Rh-PDO/TiO<sub>2</sub>, Rh-PDO/def-TiO<sub>2</sub>, Rh NPs/TiO<sub>2</sub>, Rh-DPTZ/def-TiO<sub>2</sub>, and Rh-BPDCA/def-TiO<sub>2</sub>. Rh wt.% is measured from ICP-MS. The first three rows of this table are reproduced from **Table 1** for comparison to the bottom two rows.

| Catalyst                      | XPS<br>PDO/Rh<br>mole<br>ratio <sup>a</sup> | XPS<br>Rh/Ti<br>mole<br>ratio | XPS<br>Cl/Rh<br>mole<br>ratio | XPS<br>PDO/Ti<br>mole<br>ratio | ICP<br>Rh wt.%    |
|-------------------------------|---------------------------------------------|-------------------------------|-------------------------------|--------------------------------|-------------------|
| Rh-PDO/TiO <sub>2</sub>       | 2.31                                        | 0.017                         | 0.41                          | 0.039                          | 0.16              |
| Rh-PDO/def-TiO <sub>2</sub>   | 1.14                                        | 0.034                         | 0.41                          | 0.038                          | 0.33 <sup>b</sup> |
| Rh NPs/TiO <sub>2</sub>       | N/A                                         | 0.096                         | 0.73                          | N/A                            | 0.70              |
| Rh-DPTZ/def-TiO <sub>2</sub>  | 1.01                                        | 0.015                         | 0.79                          | 0.044                          | 0.07              |
| Rh-BPDCA/def-TiO <sub>2</sub> | 1.89                                        | 0.016                         | 0.60                          | 0.030                          | 0.03              |

<sup>a</sup> Calculated from XPS N 1s peak area and Pt Rh 3d peak area.

<sup>b</sup> Rh-PDO/def-TiO<sub>2</sub> with a 1:9 precursor ratio, has 0.22 Rh wt% in ICP-MS.

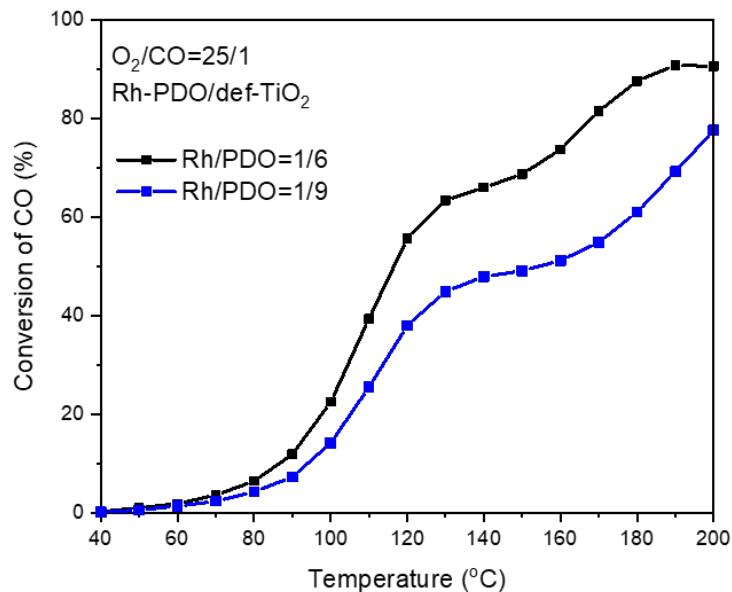

**Fig. S2.** CO conversion as a function of reaction temperature over Rh-PDO on defective TiO<sub>2</sub> for two samples prepared with Rh:PDO precursor ratios of 1:6 (black curve) or 1:9 (blue curve). With a higher molar ratio of PDO (blue curve), the conversion of CO is slightly lower, but the shape of the conversion curve is similar. The higher loading of the ligand may occupy some of the active sites of Rh.

**Table S2.** Parameters used for the fitting of EXAFS spectra are shown in **Figs. 6b, S7, S9, and S10**. All samples were analyzed just after synthesis and before running a catalytic reaction, except the samples labeled “post-reaction” were measured after the reaction. Rh-Rh and Rh-O shells were determined from Rh foil and Rh<sub>2</sub>O<sub>3</sub> samples, respectively (**Fig. S10 and Table S3**).

| Catalyst                                    | <i>k</i> range | R range | Rh-Cl       |              |                          | Rh-N/O      |               |                          | Reduced $\chi^2$ | R factor |
|---------------------------------------------|----------------|---------|-------------|--------------|--------------------------|-------------|---------------|--------------------------|------------------|----------|
|                                             |                |         | N           | R (Å)        | $\sigma^2$ ( $10^{-3}$ ) | N           | R (Å)         | $\sigma^2$ ( $10^{-3}$ ) |                  |          |
| Rh-PDO/def-TiO <sub>2</sub>                 | 3-14.9         | 1-3     | 1.4(± 0.4)  | 2.33(± 0.01) | 2(± 2)                   | 4.8 (± 0.6) | 2.03 (± 0.01) | 3(± 1)                   | 806              | 0.014    |
| Rh-PDO/TiO <sub>2</sub>                     | 3-13.5         | 1-3     | 1.0 (± 0.4) | 2.32(± 0.01) | 1 (± 2)                  | 5.1 (± 0.6) | 2.03 (±0.01)  | 3 (± 1)                  | 447              | 0.010    |
| Rh-DPTZ/def-TiO <sub>2</sub>                | 3-14.7         | 1-3     | 0.9(± 0.4)  | 2.33(± 0.01) | 2(± 3)                   | 5.2 (± 0.7) | 2.02 (±0.01)  | 4(± 1)                   | 298              | 0.017    |
| Rh-BPDCA/def-TiO <sub>2</sub>               | 3-13.4         | 1-3     | 0.1 (± 0.1) | 2.30(± 0.01) | 1(± 4)                   | 5.1 (± 0.6) | 2.02(± 0.01)  | 2(± 1)                   | 230              | 0.014    |
| Rh-PDO/def-TiO <sub>2</sub> (post-reaction) | 3-14.8         | 1-3     | 1.5(± 0.5)  | 2.33(± 0.01) | 2(± 2)                   | 4.6(± 0.7)  | 2.03(± 0.01)  | 3(± 1)                   | 790              | 0.017    |
| Rh-PDO/TiO <sub>2</sub> (post-reaction)     | 3-14.7         | 1-3     | 1.0(± 0.4)  | 2.32(± 0.02) | 2(± 3)                   | 5.2(± 0.6)  | 2.03(± 0.04)  | 3(± 1)                   | 340              | 0.013    |
| Catalyst                                    | <i>k</i> range | R range | Rh-Rh       |              |                          | Rh-N/O      |               |                          | Reduced $\chi$   | R factor |
| Rh NPs/TiO <sub>2</sub>                     | 3-13.7         | 1-3     | 1.7(± 0.9)  | 2.69(± 0.02) | 11 (± 5)                 | 5.2(± 0.4)  | 2.03(± 0.01)  | 3(± 1)                   | 1430             | 0.027    |
| Rh NPs/TiO <sub>2</sub> (post-reaction)     | 3-14.8         | 1-3     | 1.2(± 0.7)  | 2.69(± 0.03) | 10 (± 6)                 | 5.5(± 0.3)  | 2.03(± 0.01)  | 3(± 1)                   | 269              | 0.020    |

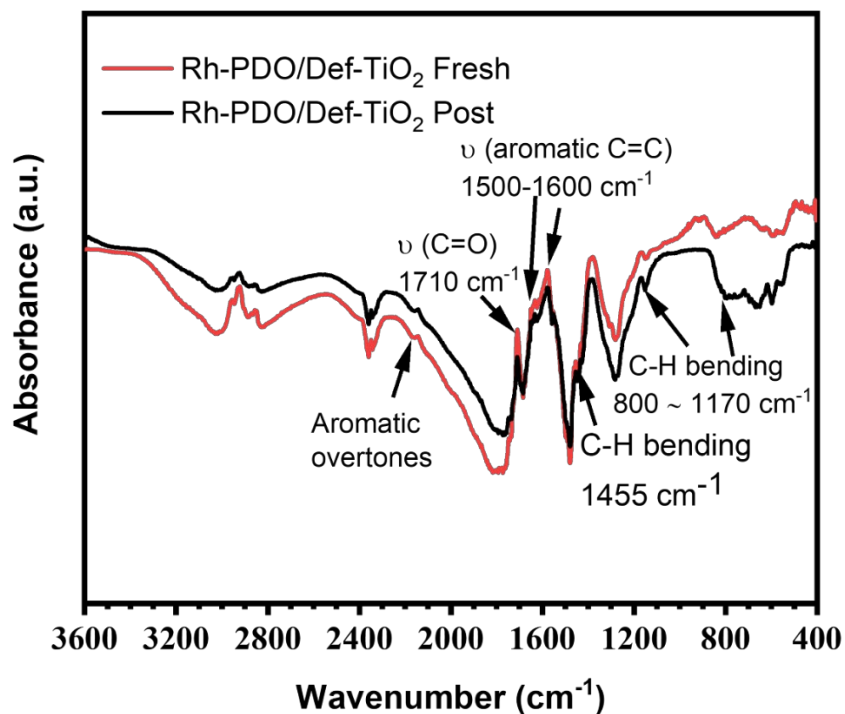

**Fig. S3.** DRIFT spectra of Rh-PDO/def-TiO<sub>2</sub> as a fresh catalyst (red curve) and after the CO oxidation reaction (black curve). A background spectrum was collected using bare TiO<sub>2</sub>. Consistent with XPS results (**Fig. S8**), these spectra show that the ligand is present on the catalyst before and after the reaction, as indicated by features indicated in the figure. Formate species (2860 cm<sup>-1</sup> and 2930 cm<sup>-1</sup>) on TiO<sub>2</sub> show some desorption under reaction conditions.

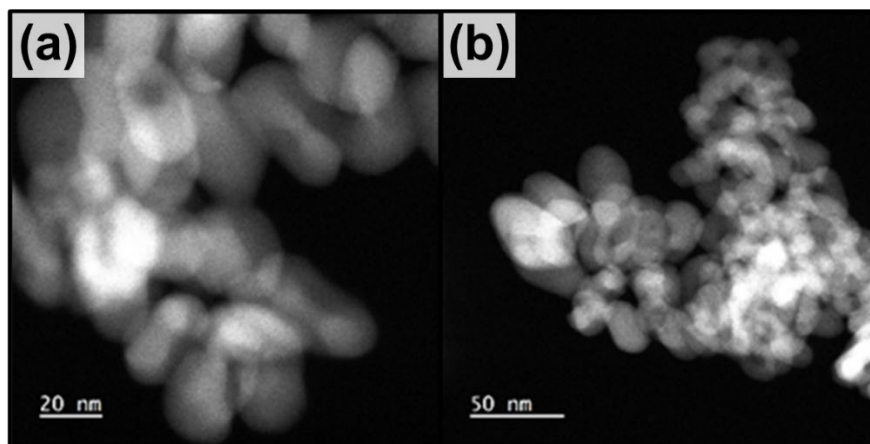

**Fig. S4.** STEM images of Rh-PDO on pristine TiO<sub>2</sub>. No significant Rh nanoparticle formation is observed. These images were obtained with a JEOL JEM 3200FS microscope.

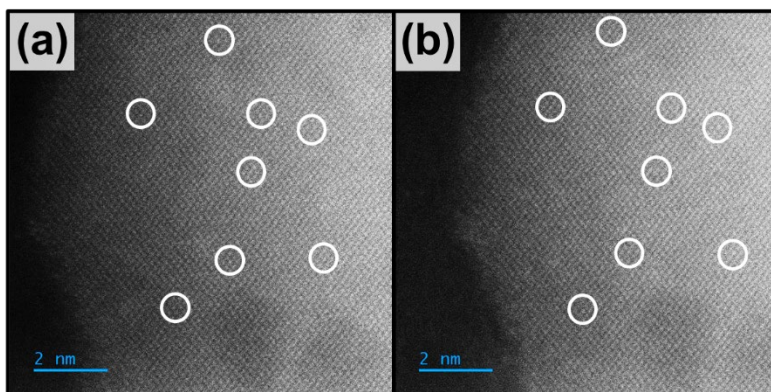

**Fig. S5.** STEM images of Rh-PDO on defective TiO<sub>2</sub>. These two images were recorded subsequently in the same area. Detecting Rh single atoms on a TiO<sub>2</sub> support is expected to be difficult based on prior studies because the atomic number difference is not significant enough for strong contrast. There are several bright features that appear in both images (marked by circles); however, the identification of these features is not clear enough for a thorough analysis. These images were obtained with a JEOL JEM NEOARM microscope.



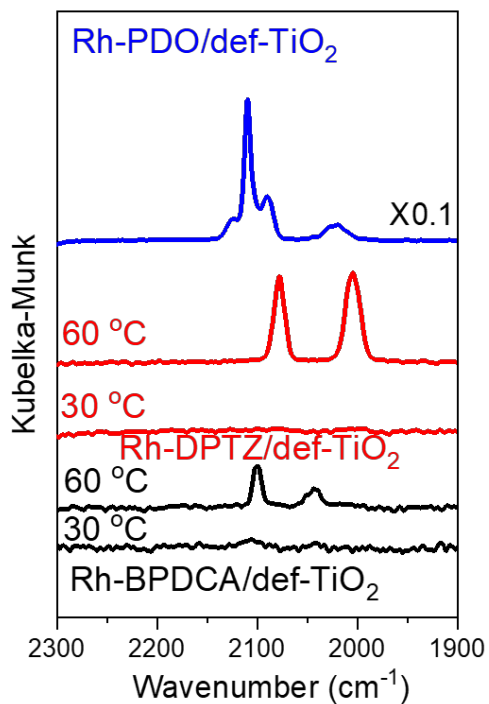

**Fig. S6.** DRIFT spectra of CO adsorption on Rh-PDO/def-TiO<sub>2</sub> (1:9) at 30 °C, on Rh-DPTZ/def-TiO<sub>2</sub> at 30 °C and 60 °C, and Rh-BPDCA/def-TiO<sub>2</sub> at 30 °C and 60 °C. At 30 °C, there is no CO adsorption on Rh-BPDCA or Rh-DPTZ, but upon heating to 60 °C, some surface species desorb, allowing for adsorption of CO. CO peak positions on Rh-DPTZ (2012 cm<sup>-1</sup> and 2084 cm<sup>-1</sup>) indicate Rh<sup>0</sup>(CO)<sub>2</sub> gem-dicarbonyl species. CO adsorption on Rh-PDO or Rh-BPDCA (2090 cm<sup>-1</sup> and 2110 cm<sup>-1</sup>) indicates adsorption on Rh<sup>δ+</sup> species. See discussion in the manuscript (section 3.2).

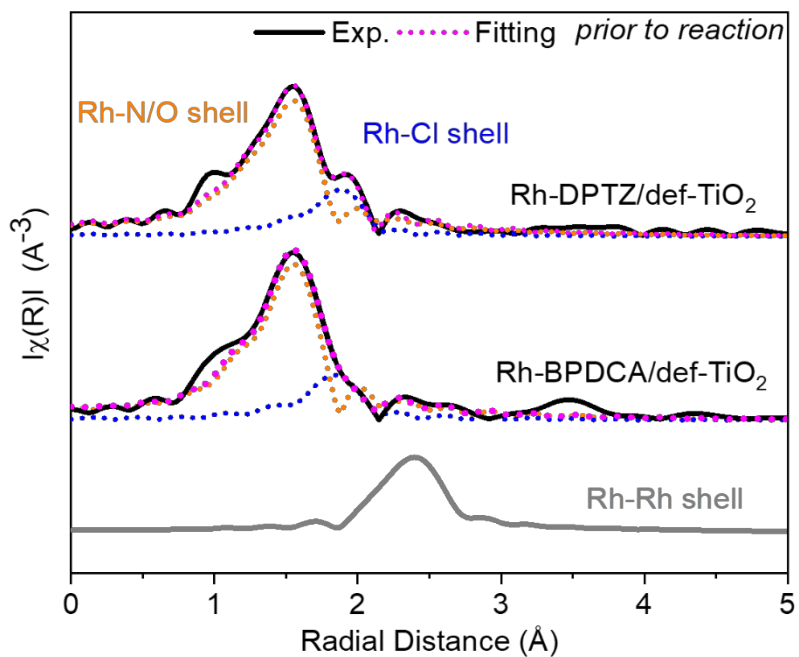

**Fig. S7.** Fourier transform magnitude of  $k^2$ -weighted Rh  $K$ -edge EXAFS data of Rh-DPTZ and Rh-BPDCA on defective  $\text{TiO}_2$  and the fitting result in the first shell. The corresponding fitting data is given in **Table S2**. The results show that no Rh-Rh contribution for the two catalysts.

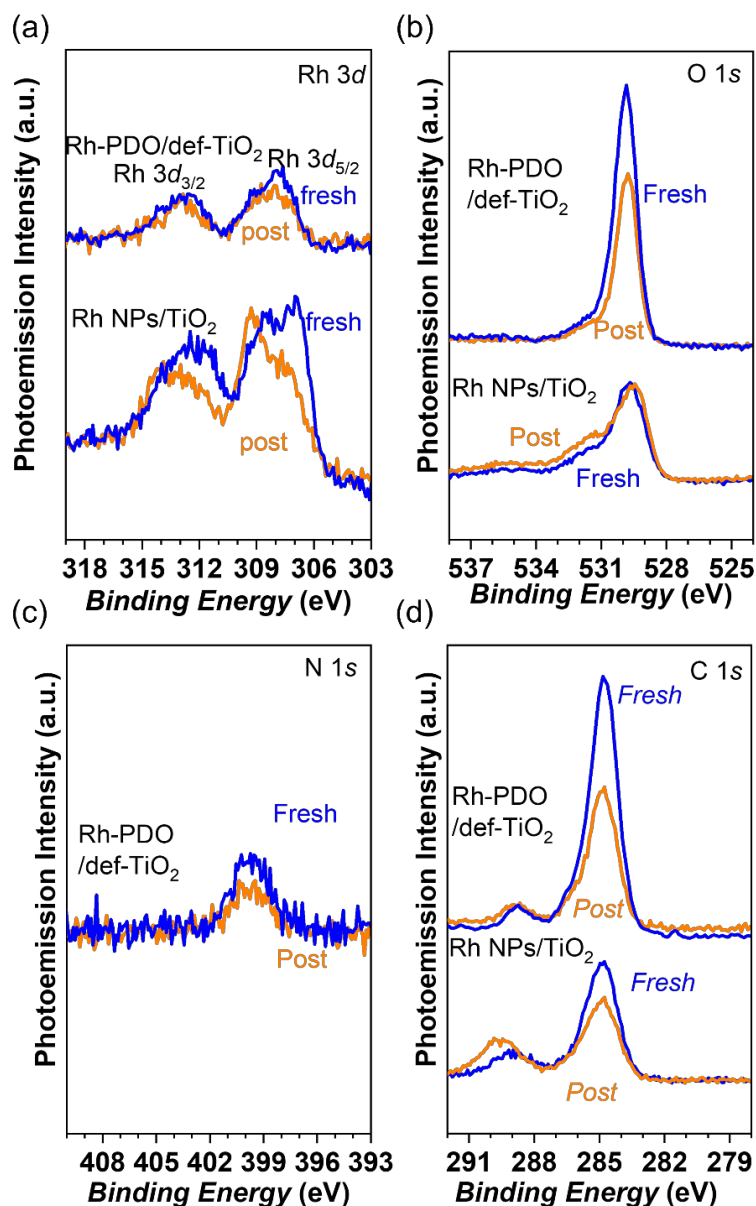

**Fig. S8.** XPS spectra of (a) Rh 3d, (b) O 1s, (c) N 1s, and (d) C 1s for the fresh (blue curve) and post-reaction catalysts (yellow curve) that include Rh-PDO/def-TiO<sub>2</sub> (top) and Rh NPs/TiO<sub>2</sub> (bottom). Panel (a) presents the same Rh 3d data as in Fig. 10. The O 1s spectra (b) show an increased intensity in the shoulder peak at higher BE (ca. 532 eV), which belongs to the oxygen species in surface hydroxyls. Although there is some decrease in O and C after the reaction due to the desorption of other surface species, when considered together with the N 1s signal (c), the C, N, and O together show the presence of ligand before and after the reaction for Rh-PDO/def-TiO<sub>2</sub> sample. The C 1s spectra (d) for Rh NPs/TiO<sub>2</sub> after reaction have shown an increase of peak intensity at higher BE positions (288-291 eV), which may be ascribed to the Rh-carbonate.

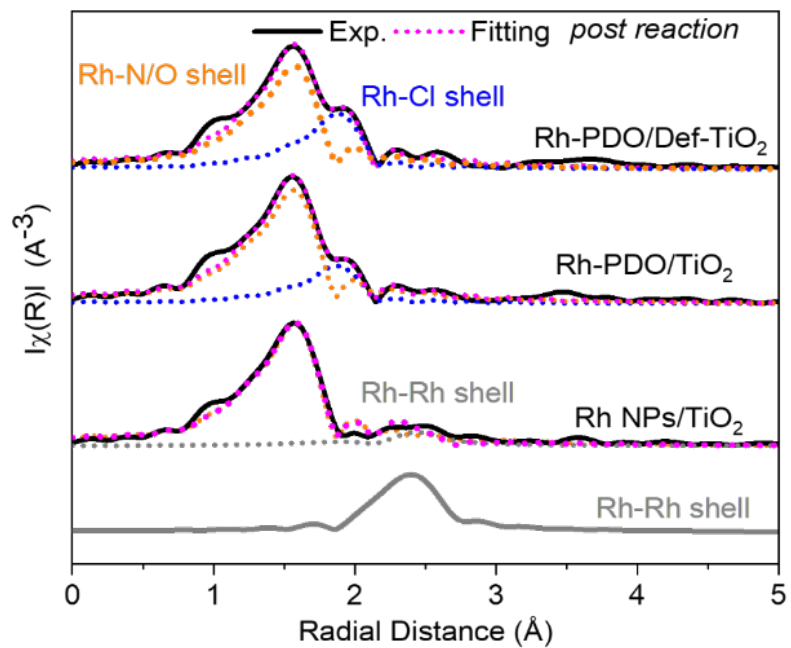

**Fig. S9.** EXAFS for Rh-PDO/TiO<sub>2</sub>, Rh-PDO/def-TiO<sub>2</sub>, and Rh NPs/TiO<sub>2</sub> post reactions. These spectra are virtually unchanged from pre-reaction measurements (**Fig. 6b**).

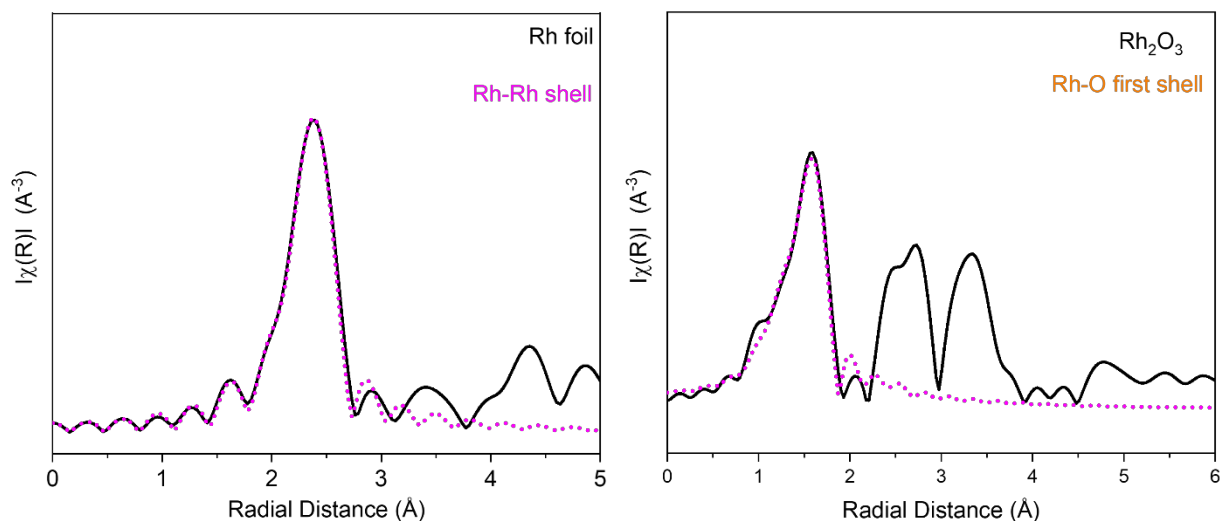

**Fig. S10.** (a) Fourier transform magnitude of  $k^2$ -weighted Rh  $K$ -edge EXAFS data of Rh foil and the fitting result in the first shell. The fitting is carried out using the Rh-Rh path for Rh metal,  $R_{\text{eff}} = 2.689$ , computed by FEFF.  $N$  (Rh-Rh) is fixed to be 12. The  $k$  range is selected between 3–13  $\text{\AA}^{-1}$  and the  $R$  range is 1–3  $\text{\AA}$ . (b) Fourier transform magnitude of  $k^2$ -weighted Rh  $K$ -edge EXAFS data of  $\text{Rh}_2\text{O}_3$  and its fitting result in the first shell. The fitting is carried out using Rh-O path from  $\text{Rh}_2\text{O}_3$ , and  $N$  (Rh-O) is fixed to be 6. The  $k$  range is 3–14  $\text{\AA}^{-1}$  and the  $R$  range is 1–3  $\text{\AA}$ . The Rh-O-Rh shell is not considered during fitting. The  $S_0^2$  and  $\Delta E_0$  in **Table S3** were used to fit the EXAFS spectra for the catalysts, the results of which are given in **Table S2**.

**Table S3.** EXAFS fitting parameters for the two Rh standards. The  $S_0^2$  and  $\Delta E_0$  were used to fit the Rh-O (first row) path for the Rh-ligand/ $\text{TiO}_2$  catalysts (**Table S2**), Rh-O path (first row), and Rh-Rh path (second row) for Rh NPs/ $\text{TiO}_2$  without ligand (**Fig. 6**). The  $k$  range for each of these is 3–14  $\text{\AA}^{-1}$ .

| Pt standard             |            | $S_0^2$    | $\Delta E_0/\text{eV}$ | $R$ ( $\text{\AA}$ ) | $\sigma^2$ ( $10^{-3}$ ) | Reduced $\chi^2$ | $R$ -factor |
|-------------------------|------------|------------|------------------------|----------------------|--------------------------|------------------|-------------|
| $\text{Rh}_2\text{O}_3$ | Rh-O path  | 0.8(0.2)   | -0.9(3.7)              | 2.04(0.03)           | 3 (1)                    | 9083             | 0.337       |
| Rh foil                 | Rh-Rh path | 0.75(0.06) | -6.8(0.7)              | 2.69(0.01)           | 3.4 (0.4)                | 2384             | 0.009       |

## References

1. X. Zhou, L. Chen, G. E. Sterbinsky, D. Mukherjee, R. R. Unocic and S. L. Tait, *Catal. Sci. Technol.*, 2020, **10**, 3353-3365.
2. W. Chen, H. Shen, X. Zhu, G. Liu, C. Pan, F. Huang, Y. Fang, Y. Guo and Z. Luo, *Catalysts*, 2022, **13**, 70.
3. J. Yang, S. Hu, Y. Fang, S. Hoang, L. Li, W. Yang, Z. Liang, J. Wu, J. Hu and W. Xiao, *ACS Catal.*, 2019, **9**, 9751-9763.
4. D. Qi, J. Yao, X. Luo and X. Lu, *Chem. pap.*, 2022, **76**, 6975-6983.
